# Supplementary material for: Diagnostic and prognostic values of AKR1C3 and AKR1D1 in hepatocellular carcinoma
Source: publisher site journal article supplement (doi:10.18632/aging.202380), 2021-01-20
Supplement: Supplementary file [file aging-v13i3-202380-supplementary-material-SD1.pdf]

# SUPPLEMENTARY FIGURES

**A**

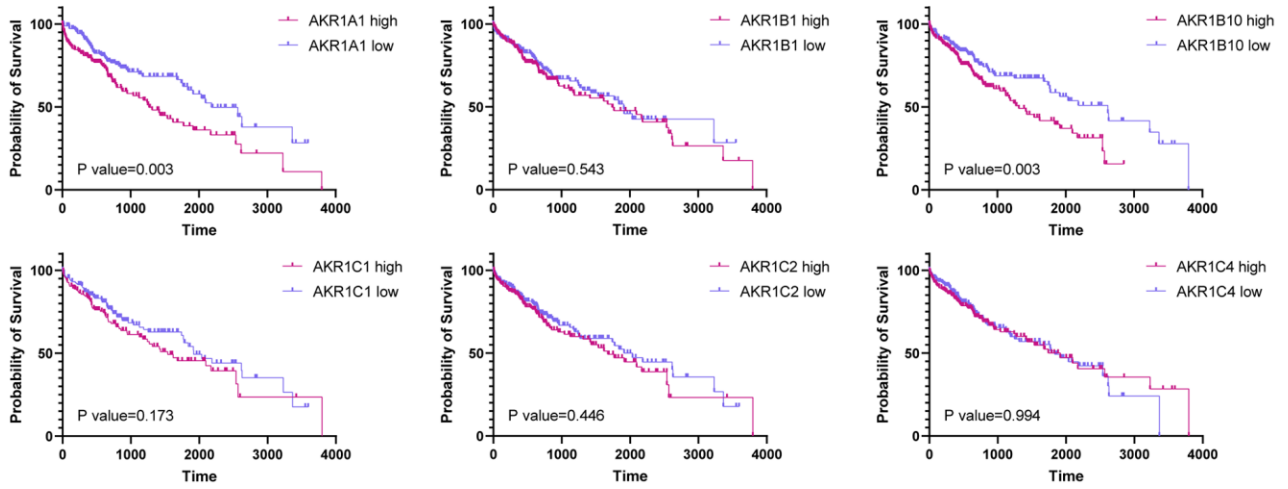

**B**

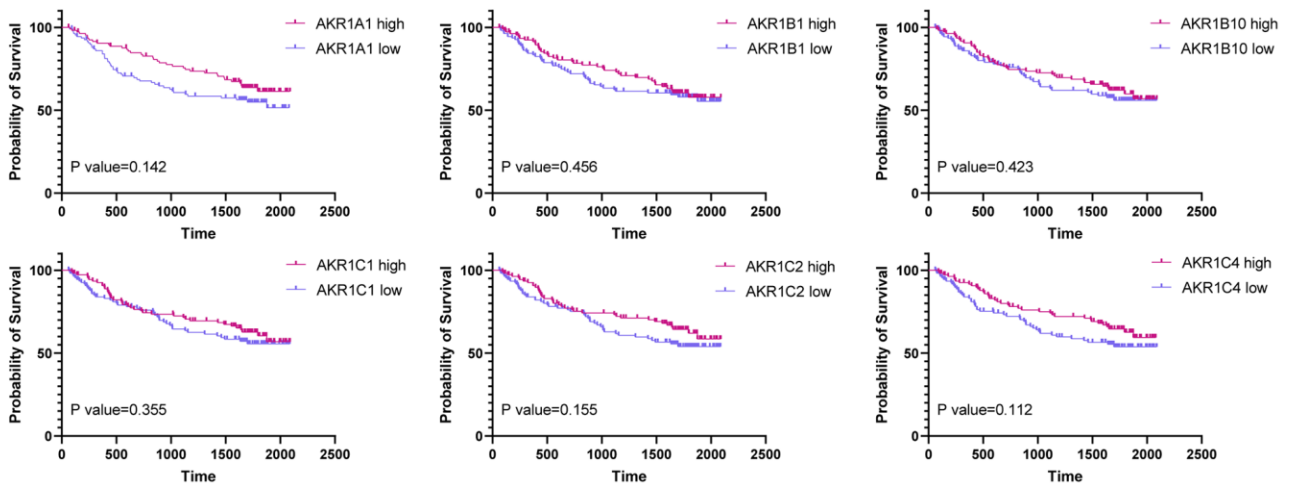

**Supplementary Figure 1.** The survival analysis of other AKR1s in the training (A) and validation (B) sets.

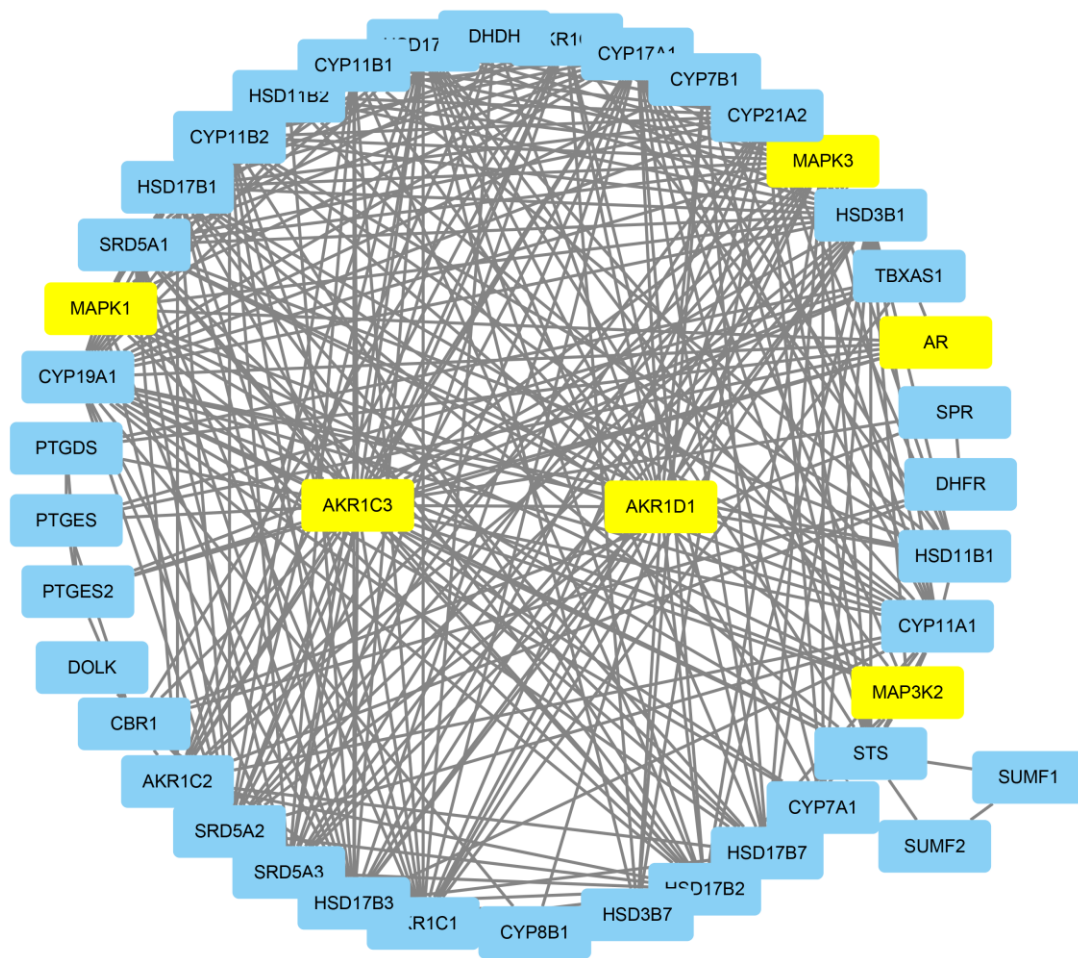

Supplementary Figure 2. The results of protein-protein interaction (PPI) analysis.
